# Supplementary material
Source: PubMed Central journal article supplement (PMC4827346)

## Supplementary data

**Figure 1. PARP<sup>+/+</sup> and PARP-1<sup>-/-</sup> mice show similar levels of NTS deposition in kidneys.** To determine whether PARP<sup>+/+</sup> and PARP-1<sup>-/-</sup> mice show similar NTS deposition, mice were injected with 6ml/kg NTS and kidneys were harvested 30h and 3 days later. Kidneys frozen in OCT were cut, fixed in acetone and stained with Alexa Fluor 488 conjugated donkey anti-sheep IgG. PARP<sup>+/+</sup> and PARP-1<sup>-/-</sup> mice injected with NTS showed similar NTS deposition (upper panels). Higher magnification shows a immune deposition with a linear pattern, indicating the specificity of the NTS toward components of the glomerular basement membrane.

**Figure 2. PARP-1<sup>-/-</sup> mice show normal T and B cell development and maturation.**

A. We investigated maturation of double negative (DN, CD4<sup>-</sup>CD8<sup>-</sup>) T cells, from early T cell precursors (ETP) (CD4<sup>-</sup>CD8<sup>-</sup>CD44<sup>high</sup>CD25<sup>-</sup>), to their different stages of DN1 (CD4<sup>-</sup>CD8<sup>-</sup>CD44<sup>+</sup>CD25<sup>-</sup>), DN2 (CD4<sup>-</sup>CD8<sup>-</sup>CD44<sup>high</sup>CD25<sup>+</sup>), DN3 (CD4<sup>-</sup>CD8<sup>-</sup>CD44<sup>-</sup>CD25<sup>+</sup>), and DN4 (CD4<sup>-</sup>CD8<sup>-</sup>CD44<sup>-</sup>CD25<sup>-</sup>). We have also investigated their maturation from DN (CD4<sup>-</sup>CD8<sup>-</sup>) to double positive (DP CD4<sup>+</sup>CD8<sup>+</sup>), and finally single positive (SP) T cells (CD4<sup>-</sup>CD8<sup>+</sup> and CD4<sup>+</sup>CD8<sup>-</sup>). We characterized 3-5 months old male and female mice and found no difference between the PARP-1<sup>-/-</sup> and PARP-1<sup>+/+</sup> strain. These results demonstrate that the T cell development in the absence of PARP-1 is normal. B. We performed flow cytometry characterization of precursors and mature B cells by using the following markers- Bone Marrow: PreB cells (CD19<sup>+</sup>B220<sup>lo</sup>AA4.1<sup>+</sup>) and Immature B cells (Im) (CD19<sup>+</sup>B220<sup>+</sup>AA4.1<sup>+</sup>). Transitional B cells in the Spleen: T1 (CD19<sup>+</sup>B220<sup>+</sup>AA4.1<sup>+</sup>IgM<sup>hi</sup>CD23<sup>-</sup>), T2 CD19<sup>+</sup>B220<sup>+</sup>AA4.1<sup>+</sup>IgM<sup>hi</sup>CD23<sup>+</sup> and T3 CD19<sup>+</sup>B220<sup>+</sup>AA4.1<sup>+</sup>IgM<sup>lo</sup>CD23<sup>+</sup>. Follicular Zone (FO)

(IgD<sup>+</sup>IgM<sup>lo</sup>CD23<sup>+</sup>B220<sup>hi</sup>AA4.1<sup>-</sup>) and Marginal Zone (MZ) B cells (CD19<sup>+</sup>B220<sup>+</sup>IgM<sup>hi</sup>CD21<sup>hi</sup>). We characterized 3-5 months old male and female mice and found no difference between the PARP-1<sup>-/-</sup> and PARP-1<sup>+/+</sup> strain. These results demonstrate that the B cell compartment in the absence of PARP-1 is normal.

**Figure 3. Humoral Immune Response in PARP-1<sup>-/-</sup> is normal.** PARP-1<sup>+/+</sup> and PARP-1<sup>-/-</sup> mice were immunized with 100 µg of OVA in PBS emulsified with an equal volume of CFA. Mice were bled at the times indicated and sera were tested for anti-OVA Ab levels by ELISA. PARP-1<sup>-/-</sup> mice responded to the immunogenic challenge as well as PARP-1<sup>+/+</sup> mice, as shown by the comparable levels of Abs produced (p= n.s.). Data are represented as mean ± SEM of 5 mice each group.

**Figure 4. PARP-1<sup>-/-</sup> splenocytes are resistant to necrotic cell death.**

A, Splenocytes (1X10<sup>6</sup>/ml in complete medium and 10% FCS) from male aged-matched PARP-1<sup>+/+</sup> or PARP-1<sup>-/-</sup> mice were incubated for 4 hrs w/ or w/o H<sub>2</sub>O<sub>2</sub>. Cells were harvested and stained for 5 minutes with 1mg/ml of 7AAD. And analyzed by a FACSCalibur (BD) for 7AAD permeability. In contrast to PARP-1<sup>-/-</sup> cells, PARP-1<sup>+/+</sup> cells showed early complete positivity, suggesting early necrotic cell death. B. 12 hrs after Starvation or H<sub>2</sub>O<sub>2</sub> treatment, cells were harvested and the side scatter analyzed by flow cytometry. PARP-1<sup>-/-</sup> cells starved or H<sub>2</sub>O<sub>2</sub> treated, and PARP-1<sup>+/+</sup> cells starved, show very similar scatters. In contrast PARP-1<sup>+/+</sup> cells treated with H<sub>2</sub>O<sub>2</sub> show homogenous size reduction, indicating necrotic synchronization. C. Caspase-3 activation was tested with a FITC-conjugated rabbit polyclonal Ab. The caspase was

activated during starvation in both groups. In contrast caspase-3 was activated only in the absence of PARP-1, demonstrating that only PARP-1<sup>-/-</sup> cells under went apoptotic cell death.

Supplementary Figure 1

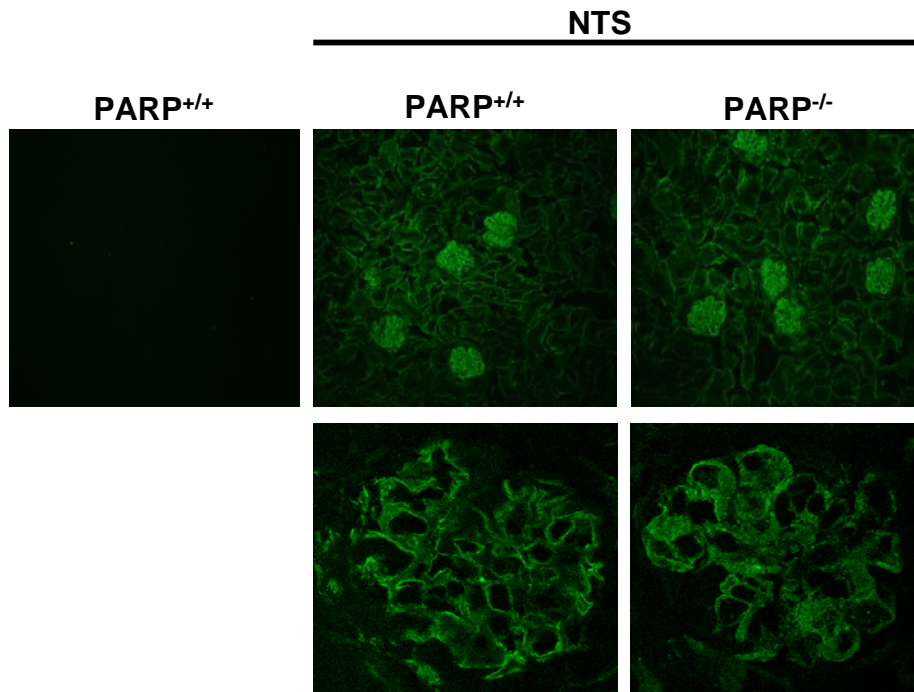

Supplementary Figure 2

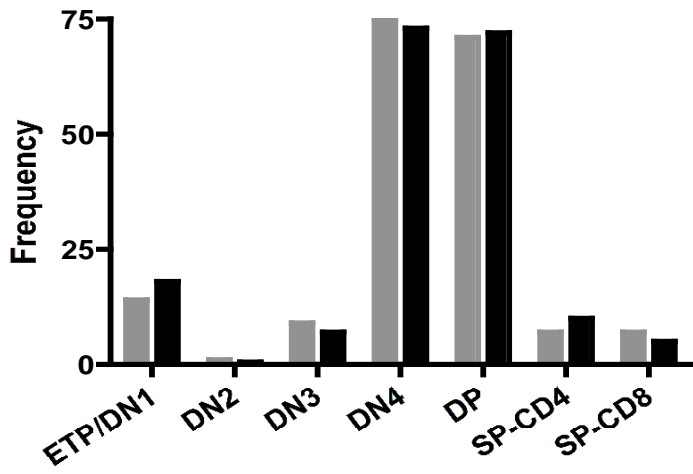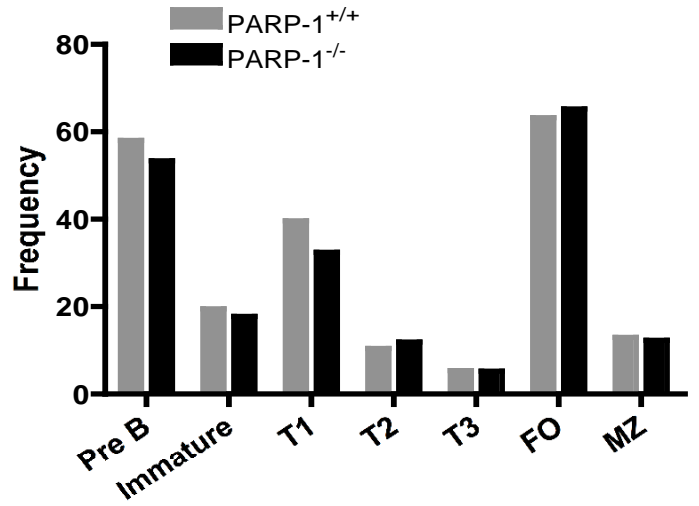

Supplementary Figure 3

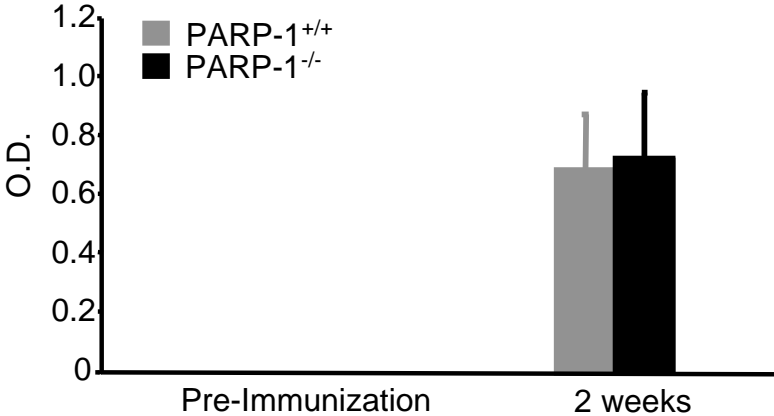

# Supplementary Figure 4

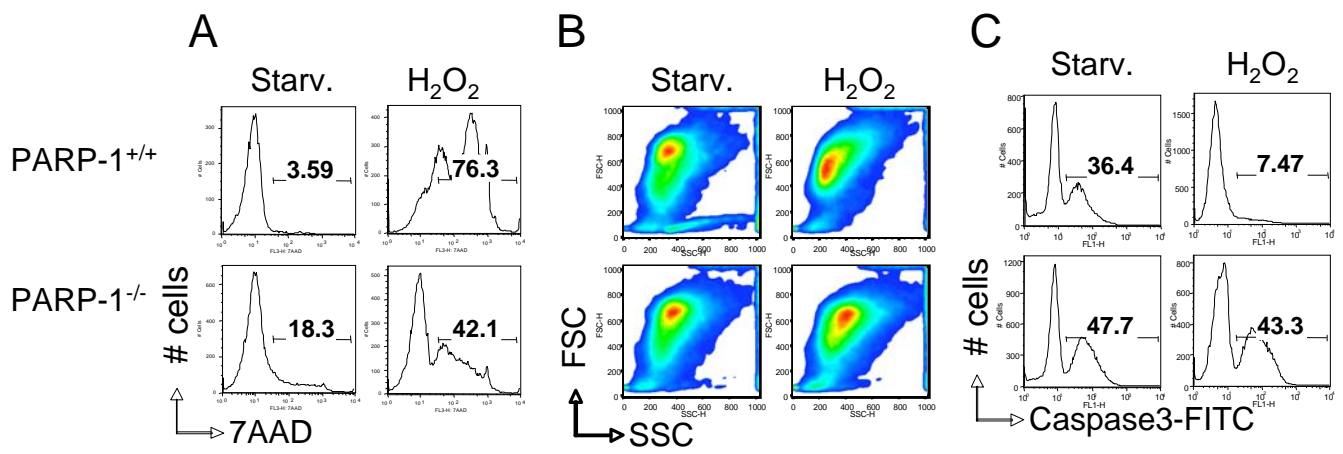

Supplement: NIHMS772388-supplement-Supplementary_Data.pdf [file NIHMS772388-supplement-Supplementary_Data.pdf]
